# Supplementary material
Source: Research Square preprint supplement (doi:10.21203/rs.3.rs-9238959/v1)
Supplement: Supplementary file 1 [file f8f5e2eca7979d4a2d24df6c.docx]

**Supplementary eTables**

**Supplementary eTable 1.The number and proportion of participants of three stratified subgroups based on the phototherapy duration for neonatal jaundice.**

|  | mean | median | standardized deviation (SD) | interquartile range (IQR) |
| --- | --- | --- | --- | --- |
| Phototherapy duration of participants | 3.8 days | 3 days | 2.411 | Q1 = 2 days  Q3 = 5 days |

| interquartile range (IQR) | phototherapy duration | numbers |
| --- | --- | --- |
| <25 percentile | ≤2 days | 52,188 (28.6%) |
| ≥25 and < 75 percentile | 3-4 days | 84,720 (46.4%) |
| ≥75 percentile | ≥5 days | 45,601 (25.0%) |
| Total |  | 182,509 (100.0%) |

**Supplementary eTable 2. Validation data of K-DST**

| HJ Chung et al. (2020) [1] | Internal consistency of developmental domains of the K-DST: Cronbach α, 0.84–0.88 of all domains at 66–71 months.  Sensitivity, 0.886; specificity, 0.951; accuracy, 0.921; false-positive, 4.9%; false-negative, 11.4%.  AUC, cerebral palsy, 0.971–0.936; developmental language disorder, 0.924–0.957; autism spectrum disorder, 0.999; intellectual disability, 0.951–0.964.  Correlation between K-DST and K-BSID-II, r = 0.38–0.68.  Correlation between K-DST and K-WPPSI, r = 0.48–0.74. |
| --- | --- |
| CH Jang (2019) [2] | Sensitivity, 82.9%; specificity, 90.9%; PPV, 98.1%, NPV 48.8%, Accuracy 84.1%  Correlation between K-DST and K-BSID-II, *r* = 0.336-0.478.  Correlation between K-DST and K-WPPSI-III, *r* = 0.216-0.658. |

Abbreviations, K-DST, Korean Developmental Screening Test for Infants and Children; AUC, area under the curve; K-BSID-II, Korean Bayley Scales of Infant Development-II; K-WPPSI, Korean Wechsler Preschool and Primary Scales of Intelligence

[1] Chung HJ, Yang D, Kim G-H, Kim SK, Kim SW, Kim YK, et al. Development of the Korean Developmental Screening Test for Infants and Children (K-DST). Clinical and experimental pediatrics. 2020;63:438.

[2] Jang CH, Kim SW, Jeon HR, Jung DW, Cho HE, Kim J, et al. Clinical usefulness of the Korean Developmental Screening Test (K-DST) for developmental delays. Annals of rehabilitation medicine. 2019;43:490.

**Supplementary eTable 3. List of items in the seventh round of the K-DST for Infants and Children, and cut-off value of a scale of 0-3 score of six domains.**

| Gross motor skills | 1. Your child can stop a rolling ball with her or his feet.  2. If you throw a tennis ball-sized ball from a distance of 2 m, your child can catch it with both hands.  3. Your child can bounce a ball on the floor once.  4. Your child can jump over a rope at a height just below the knees.  5. Your child can jump alternately with one foot.  6. Your child can do at least one jump on a jump rope.  7. Your child can lift one leg and hold it with two hands, and run more than three steps.  8. Your child can kick a rolling ball. | | |
| --- | --- | --- | --- |
| Fine motor skills | 1. Your child can touch his or her thumb to the other four fingers one after the other.  2. Your child can draw a triangle if you show her/him a triangle.  3. Your child can cut a circle with scissors.  4. Your child can draw the shape of a simple car.  5. Your child can pour water from a kettle or water bottle into a cup with little to no spillage.  6. Your child can draw a diamond if you show her/him a diamond.  7. Your child can draw objects, such as a house, a tree, and an animal, in a sufficiently recognizable form.  8. Your child can tie a ribbon. | | |
| Cognition | 1. Your child can distinguish her/his left from right.  2. Your child can recite the days of the week in order.  3. Your child knows that 500 won coins are worth more than 100 won coins.  4. Your child can say her/his birthday.  5. Your child can write down numbers from 11 to 20.  6. Your child can subtract single-digit numbers (e.g., 5 – 2 = 3).  7. Your child can remember the phone number of her/his mother, father, or guardian.  8. Your child can accurately point to today's date (month and day) on the calendar. | | |
| Language | 1. Your child knows the opposite of familiar words (e.g., hot and cold, big and small).  2. Your child can recognize the meaning of simple jokes or colloquialism.  3. When you ask your child what a word means, she/he can explain the meaning of the word (e.g., When you ask, “What are shoes?,” your child can answer, “What I wear when I go outside.”).  4. Your child can answer questions about hypothetical situations, such as “What would happen if ~?” (e.g., “What if you have a younger brother?”).  5. Your child can play word chain games.  6. Your child can write her/his name or two or four words without looking at a reference (e.g., traffic lights, South Korea).  7. Your child can tell a simple joke.  8. Your child can understand and recite simple proverbs. | | |
| Sociality | 1. Your child can easily get along with a person he/she meets for the first time.  2. Your child can play rule-based games with her/his peers.  3. Your child can talk about her/his thoughts and listen to her/his friends.  4. Your child can talk to her/his friends about how to play a game.  5. Your child can actively get along with her/his friends.  6. Your child can voluntarily say “hello” to someone she/he knows.  7. Your child often invites friends over to her/his house to play.  8. Your child often calls friends and family. | | |
| Self-care | 1. Your child can use a spoon to spread butter or jam on bread.  2. Your child can wipe herself/himself with a towel after taking a bath.  3. Your child can zip up a shirt by herself/himself.  4. Your child can change clothes on her/his own if the clothes are dirty.  5. Your child can open a milk carton by herself/himself.  6. Your child can undertake one household chore for a period of time (a week or so) (e.g., placing cutlery, organizing toys, etc.).  7. Your child can bathe by herself/himself, except for washing her/his hair.  8. Your child can clean her or his own anal area after having a bowel movement. | | |
| **Domain** | **Cutoff score** | | |
| -2SD | -1SD | 1SD |
| Gross motor skills | 15 | 19 | 23 |
| Fine motor skills | 15 | 20 | 23 |
| Cognition | 5 | 16 | 23 |
| Language | 11 | 17 | 23 |
| Sociality | 9 | 16 | 22 |
| Self-care | 11 | 16 | 23 |

**Supplementary eTable 4.** **The covariates of baseline demographic and clinical characteristics.**

| Category | Covariates |
| --- | --- |
| Demographic characteristics | sex (boy, or girl), region at birth (Seoul and metropolitan, or city and rural), calendar year at birth (2009 to 2011, or 2012 to 2015), familial income quantile for economic status (< 25, ≥ 25 and < 75, ≥ 75 percentile), |
| Clinical characteristics | low birth weight ((< 2.5 kg, or ≥ 2.5 kg), prematurity (gestational periods < 37 weeks), past history of care in the neonatal intensive care unit (NICU), chromosomal abnormalities, congenital malformations, infant feeding type (exclusive breast feeding, vs. artificial milk feeding, mixed feeding, and specilized formula), and theage of neurodevepmental status in national health screening |

**Supplementary eTable 5.** **Associations between neonatal jaundice and the abnormal K-DST results a in national health screeningb at 66 to 71 months of age, stratified by phototherapy duration.**

| **Domains of developmental screening (phototherapy duration)** |  | Control group, *n* (%) |  | Jaundice group, *n* (%) |  | cOR  (estimate, 95% CI) c | P value |  | aOR  (estimate, 95% CI) c | P value |
| --- | --- | --- | --- | --- | --- | --- | --- | --- | --- | --- |
| Overall assessment |  | 14,865/883,019 (1.68%) |  | 2,822/121,366 (2.33%) |  | 1.390 (1.335-1.448) | < 0.0001* |  | 1.046 (0.997-1.098) | 0.0635 |
| <25P |  |  |  | 749/34,683 (2.16%) |  | 1.289 (1.197-1.388) | 0.7300 |  | 1.045 (0.966-1.130) | 0.9773 |
| 25P to 75P |  |  |  | 1,179/56,555 (2.08%) |  | 1.243 (1.171-1.320) | 0.0768 |  | 1.000 (0.938-1.067 | 0.0923 |
| ≥75P |  |  |  | 894/30,128 (2.97%) |  | 1.786 (1.668-1.913) | < 0.0001* |  | 1.145 (1.056-1.241) | 0.0037* |
| Gross motor |  | 27,761/757,626 (3.66%) |  | 4,780/104,010 (4.60%) |  | 1.267 (1.228-1.307) | < 0.0001* |  | 1.087 (1.049-1.127) | < 0.0001* |
| <25P |  |  |  | 1,294/29,069 (4.45%) |  | 1.225 (1.150-1.297) | 0.5108 |  | 1.063 (1.001-1.128) | 0.7526 |
| 25P to 75P |  |  |  | 2,115/48,671 (4.35%) |  | 1.194 (1.142-1.250) | 0.6085 |  | 1.073 (1.023-1.126) | 0.9227 |
| ≥75P |  |  |  | 1,371/26,270 (5.22%) |  | 1.448 (1.369-1.531) | < 0.0001* |  | 1.153 (1.082-1.229) | 0.0026* |
| Fine motor |  | 27,623/757,626 (3.65%) |  | 4,675/104,008 (4.49%) |  | 1.244 (1.205-1.284) | < 0.0001* |  | 1.003 (0.967-1.040) | 0.8743 |
| <25P |  |  |  | 1,235/29,068 (4.25%) |  | 1.173 (1.106-1.243) | 0.4720 |  | 0.998 (0.929-1.050) | 0.3577 |
| 25P to 75P |  |  |  | 2,026/48,670 (4.16%) |  | 1.148 (1.096-1.202) | 0.0529 |  | 0.976 (0.929-1.025) | 0.0893 |
| ≥75P |  |  |  | 1,414/26,270 (5.38%) |  | 1.503 (1.423-1.588) | < 0.0001* |  | 1.081 (1.014-1.152) | 0.0061* |
| Cognition |  | 40,471/757,638 (5.34%) |  | 6,595/104,014 (6.34%) |  | 1.200 (1.168-1.232) | < 0.0001* |  | 1.045 (1.013-1.077) | 0.0052* |
| <25P |  |  |  | 1,782/29,070 (6.13%) |  | 1.157 (1.102-1.215) | 0.9907 |  | 1.031 (0.980-1.086) | 0.7102 |
| 25P to 75P |  |  |  | 2,947/48,672 (6.05%) |  | 1.142 (1.099-1.187) | 0.4385 |  | 1.029 (0.987-1.072) | 0.5564 |
| ≥75P |  |  |  | 1,866/26,272 (7.10%) |  | 1.356 (1.292-1.422) | < 0.0001* |  | 1.099 (1.040-1.161) | 0.0084* |
| Language |  | 30,408/757,709 (4.01%) |  | 5,175/104,022 (4.97%) |  | 1.252 (1.215-1.291) | < 0.0001* |  | 1.049 (1.013-1.086) | 0.0072* |
| <25P |  |  |  | 1,350/29,074 (4.64%) |  | 1.165 (1.101-1.232) | 0.2378 |  | 1.032 (0.973-1.094) | 0.6072 |
| 25P to 75P |  |  |  | 2,277/48,676 (4.68%) |  | 1.174 (1.124-1.226) | 0.3141 |  | 1.024 (0.977-1.072) | 0.3088 |
| ≥75P |  |  |  | 1,548/26,272 (5.89%) |  | 1.498 (1.421-1.578) | < 0.0001* |  | 1.125 (1.059-1.195) | 0.0014* |
| Social skills |  | 26,595/757,707 (3.51%) |  | 4,313/104,019 (4.15%) |  | 1.160 (1.123-1.200) | < 0.0001* |  | 1.009 (0.972-1.048) | 0.6286 |
| <25P |  |  |  | 1,181/29,072 (4.06%) |  | 1.164 (1.097-1.235) | 0.1948 |  | 1.026 (0.974-1.092) | 0.4696 |
| 25P to 75P |  |  |  | 1,884/48,675 (3.87%) |  | 1.107 (1.055-1.161) | 0.3598 |  | 1.003 (0.954-1.055) | 0.8372 |
| ≥75P |  |  |  | 1,148/26,272 (4.37%) |  | 1.256 (1.183-1.335) | < 0.0001* |  | 1.001 (0.934-1.072) | 0.8096 |
| Self-help |  | 31,029/757,715 (4.10%) |  | 4,984/104,019 (4.79%) |  | 1.179 (1.143-1.215) | < 0.0001* |  | 1.016 (0.981-1.052) | 0.3728 |
| <25P |  |  |  | 1,426/29,072 (4.91%) |  | 1.208 (1.144-1.276) | 0.0410* |  | 1.023 (0.966-1.084) | 0.7928 |
| 25P to 75P |  |  |  | 2,196/48,675 (4.51%) |  | 1.107 (1.059-1.157) | 0.0819 |  | 0.996 (0.951-1.045) | 0.2973 |
| ≥75P |  |  |  | 1,362/26,272 (5.18%) |  | 1.281 (1.211-1.354) | < 0.0001* |  | 1.050 (0.98501.118) | 0.2005 |

Abbreviations, n, number; K-DST, Korean developmental screening test; cOR, crude odd ratio; aOR, adjusted odd ratio; CI, confidence interval ;P, percentile.

a The neurodevelopmental screening results were categorized into advanced development, age appropriate, follow-up requests, and further evaluation recommendation. Follow-up requests, and further evaluation were considered abnormal.

b Acquired from the Korean developmental screening test of the National Health Screening Program for Infants and Children, which is conducted between 66 and 71 months.

c Adjusted by sex, birth weight, prematurity, past history of care in the neonatal intensive care units, chromosomal abnormalities, congenital malformations, region at birth**,** familialincome quantiles, calender years at birth, and infant feeding type.

* indicated P < 0
